# Supplementary material for: Unprecedented heptacopper(ii) cluster with body-centred anti-prismatic topology. Structure, magnetism and density functional study
Source: Royal Society of Chemistry journal article supplement (doi:10.1039/c1dt11119a), 2011-01-01
Supplement: c1dt11119a.pdf [file c1dt11119a.pdf]

### Electronic Supplementary Information

#### Unprecedented heptacopper(II) cluster with body-centred anti-prismatic topology. Structure, magnetism and density functional study

Himanshu Arora, Joan Cano, Francesc Lloret and Rabindranath Mukherjee\*

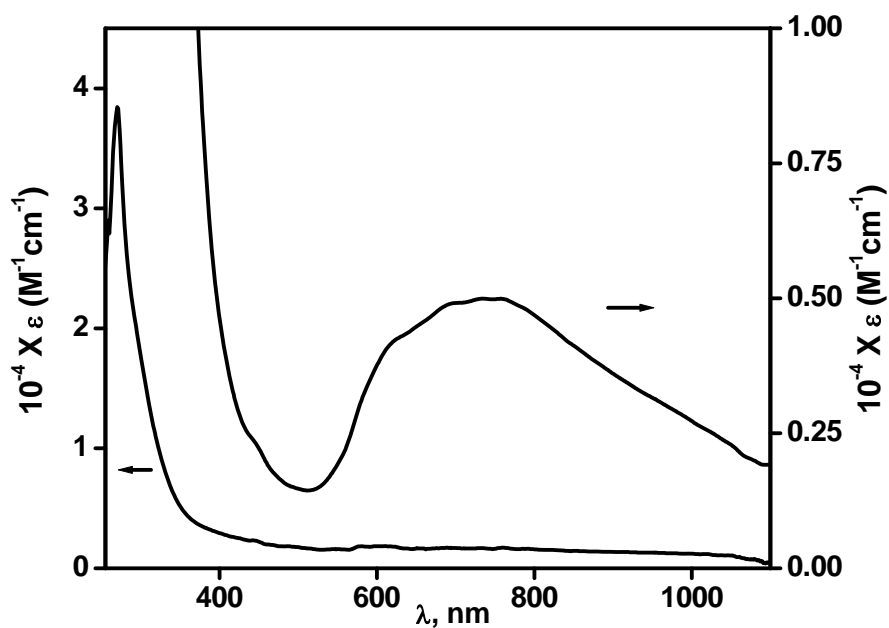

**Fig. S1.** UV-VIS spectrum (in DMF) of  $[\text{Cu}^{\text{II}}_7(\text{L})_4(\mu_3\text{-OH})_2(\text{H}_2\text{O})_2(\text{DMF})_2][\text{ClO}_4]_4 \cdot 4\text{H}_2\text{O}$  (**1**).

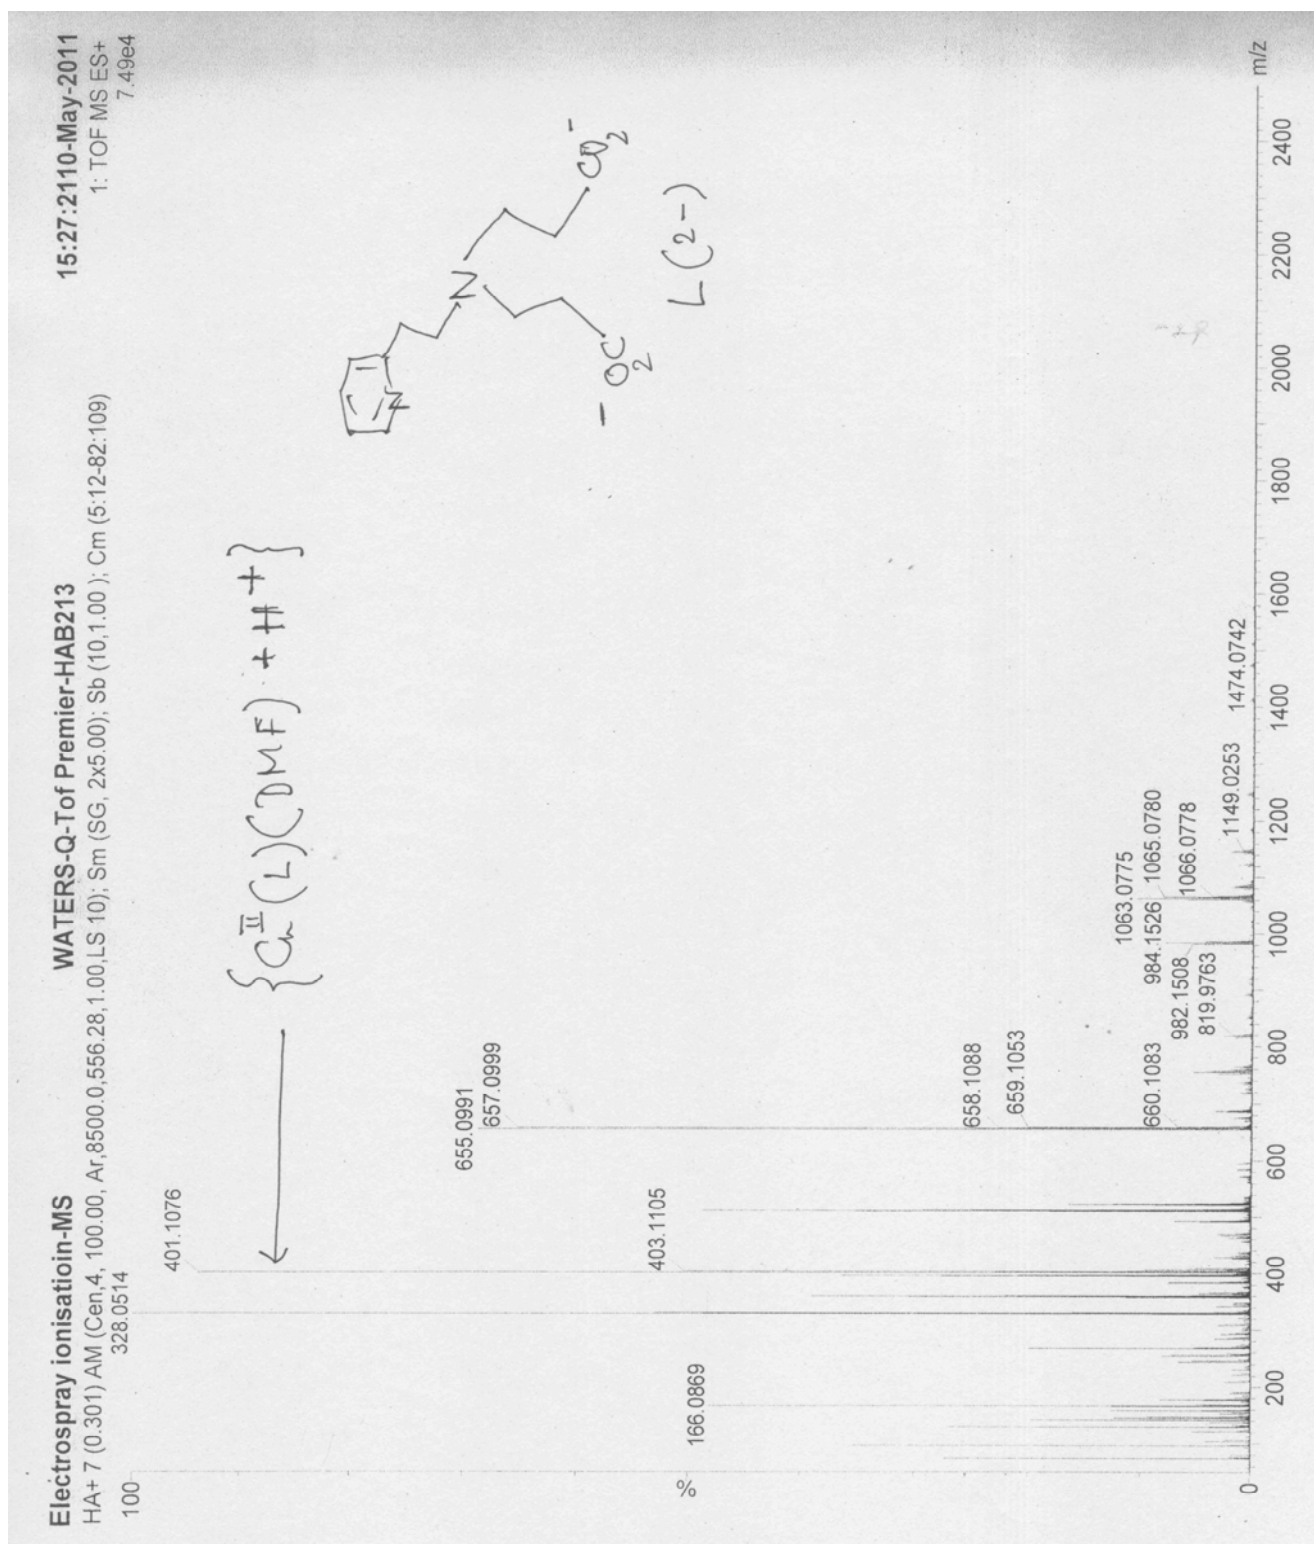

**Fig. S2.** ESI-MS spectrum (in  $CH_3CN$ ) of  $[Cu^{II}_7(L)_4(\mu-OH)_2(H_2O)_2(DMF)_2]-[ClO_4]_4 \cdot 4H_2O$  (**1**).

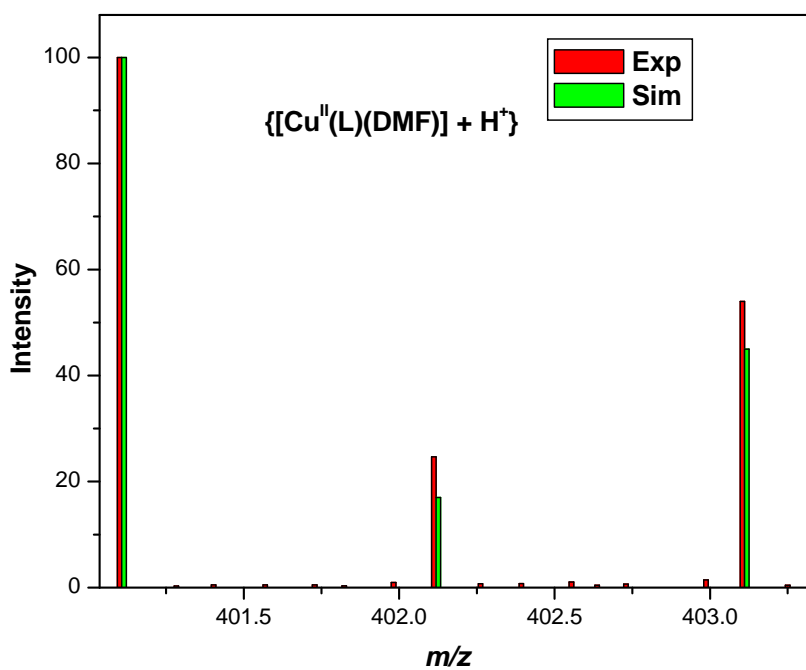

**Fig. S3.** Experimental and simulated ESI-mass peak (in CH<sub>3</sub>CN) of [Cu<sup>II</sup><sub>7</sub>(L)<sub>4</sub>(μ-OH)<sub>2</sub>(H<sub>2</sub>O)<sub>2</sub>(DMF)<sub>2</sub>][ClO<sub>4</sub>]<sub>4</sub> · 4H<sub>2</sub>O (**1**) at m/z = 401.11.
